# Supplementary material
Source: PubMed Central journal article supplement (PMC9556538)
Supplement: 41386_2022_1393_MOESM1_ESM.pdf [file 41386_2022_1393_MOESM1_ESM.pdf]

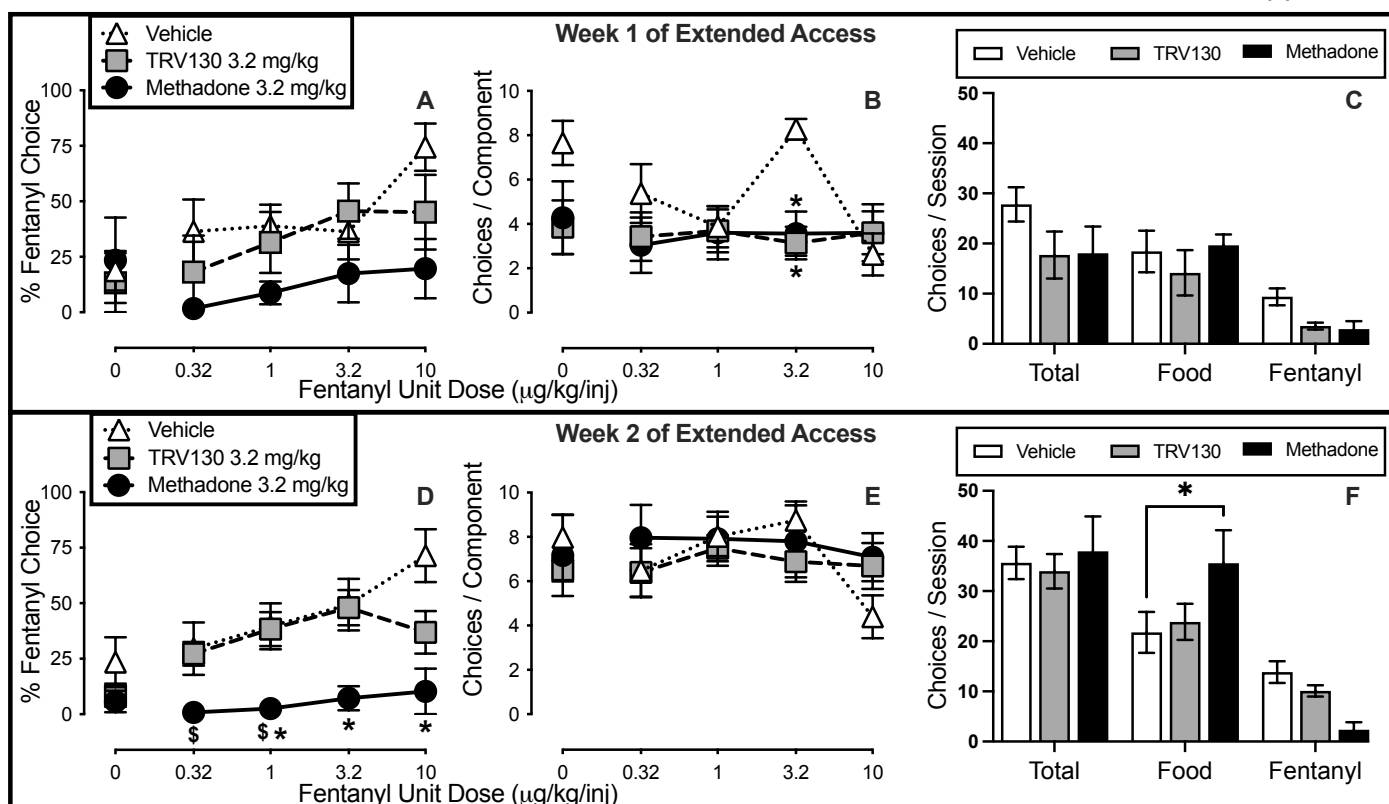

**Supplemental Figure 1.** Effects of repeated vehicle, TRV130, and methadone treatment on fentanyl- vs.-food choice in male rats assessed 8 h after overnight (6:00 PM–6:00 AM) extended access fentanyl self-administration sessions. (A, D) Opioid-withdrawal effects on percent fentanyl choice. (B, E) Percentage of completed ratio requirements on the fentanyl-associated lever. (A, B, D, E) X-axis: Intravenous unit fentanyl dose in micrograms per kilogram per injection. (C, F) Number of choices completed per session. Points and bars represent mean  $\pm$  SEM. Data of week 1 and week 2 show averaged results of the choice sessions within that particular week. \* Denotes significant difference relative to vehicle; \$ Denotes significant difference from TRV130,  $p < 0.05$ . See Supplemental Materials Table 1 for statistics relevant to each panel. Vehicle:  $n=8$ ; TRV130:  $n=7$ ; Methadone:  $n=5$ .

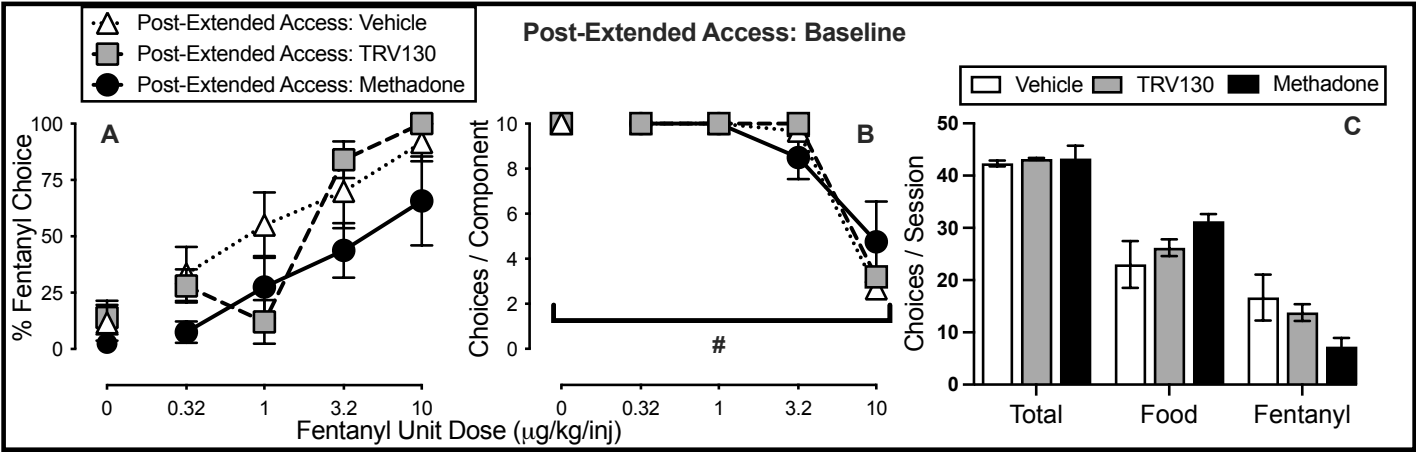

**Supplemental Figure 2.** Comparison of fentanyl-vs.-food choice in post-opioid-dependent male rats following a one week “washout” period. **(A)** Percent fentanyl choice. **(B)** Percentage of completed ratio requirements on the fentanyl-associated lever. **(A and B)** x-axis: Intravenous unit fentanyl dose in micrograms per kilogram per injection. **(C)** Number of choices completed per session. Points and bars represent mean ± SEM. Vehicle, TRV130, and methadone data show data collected Friday of the “washout” week. # Denotes a significant treatment history × fentanyl unit dose interaction,  $p < 0.05$ . See Supplemental Materials Table 1 for statistics relevant to each panel. Vehicle: n=8; TRV130: n=7; Methadone: n=5.

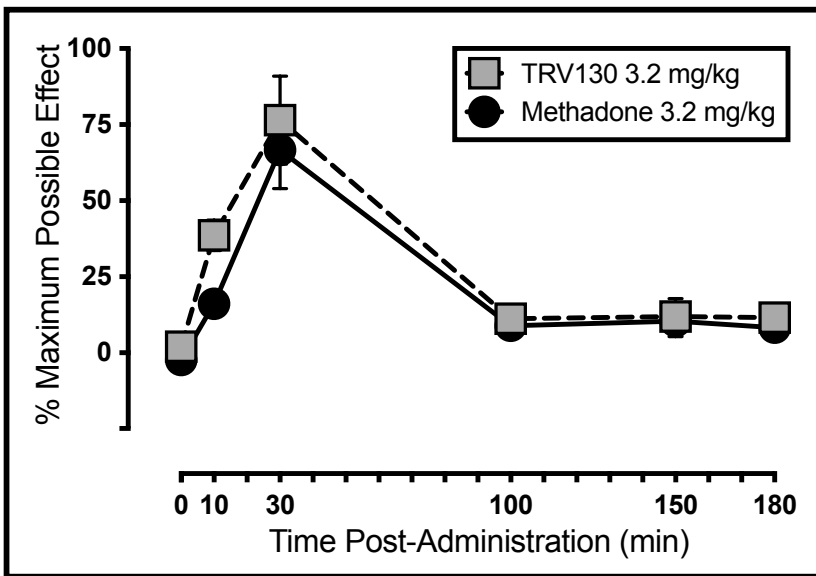

**Supplemental Figure 3.** Antinociceptive timecourse of 3.2 mg/kg TRV130 and 3.2 mg/kg methadone administered subcutaneously in a warm-water tail withdrawal procedure (50°C). y-axis: Percent maximum possible effect (20s). x-axis: Time (minutes) post drug administration. Raw baseline tail-withdrawal latencies mean ( $\pm$ SEM): TRV130: 3.4 s ( $\pm$ 0.4); Methadone: 3.7 s ( $\pm$ 0.5). Points represent mean  $\pm$ SEM. N=5 male rats.
